# Supplementary material for: Can HNNH, FNNH, or HNCHOH bridge the σ-hole and the lone pair at P in binary complexes with H2XP, for X = F, Cl, NC, OH, CN, CCH, CH3, and H?
Source: Royal Society of Chemistry journal article supplement (doi:10.1039/c5cp05832e), 2015-01-01
Supplement: c5cp05832e1.pdf [file c5cp05832e1.pdf]

## Electronic supplementary information

Can HN=NH, FN=NH, or HN=CHOH Bridge the  $\sigma$ -Hole and the Lone Pair at P in Binary Complexes with H<sub>2</sub>XP, for X = F, Cl, NC, OH, CN, CCH, CH<sub>3</sub>, and H?

Janet E. Del Bene, Ibon Alkorta, and José Elguero

|             |                                                                                                                                                                                             |
|-------------|---------------------------------------------------------------------------------------------------------------------------------------------------------------------------------------------|
| Pg. S2 – S7 | Table S1. Structures, total energies, and molecular graphs of complexes of HN=NH, FN=NH, and NH=CHOH with H <sub>2</sub> XP, for X = F, Cl, NC, OH, CN, CCH, CH <sub>3</sub> , and H        |
| Pg. S8-S9   | Table S2. Electron density properties at the intermolecular BCPs                                                                                                                            |
| Pg. S10     | Figure S1. Energy densities at bond critical points (au) vs. the P-N distance (Å) for P...N pnictogen bonds (Å) in H <sub>2</sub> XP:NH=CHOH complexes                                      |
| Pg. S10     | Figure S2. Energy densities at bond critical points (au) vs the P-H <sub>2</sub> distance (Å) for hydrogen bonds in H <sub>2</sub> XP:NH=CHOH complexes                                     |
| Pg. S11     | Table S3. Components of spin-spin coupling constants <sup>1</sup> pJ(P-N <sub>1</sub> ) (Hz) for complexes of H <sub>2</sub> XP with HN=NH, FN=NH, and NH=CHOH                              |
| Pg. S12     | Table S4. Components of spin-spin coupling constants J(N <sub>2</sub> -P) (Hz) for complexes of H <sub>2</sub> XP with HN=NH and FN=NH, and <sup>2</sup> hJ(O-P) for complexes with NH=CHOH |
| Pg. S13     | Figure S3. <sup>2</sup> hJ(O-P) versus the O-P distance for complexes H <sub>2</sub> XP:NH=CHOH                                                                                             |

Table S1. Structures, total energies, and molecular graphs of complexes of HN=NH, FN=NH, and NHCHOH with H<sub>2</sub>XP, for X = F, Cl, NC, OH, CN, CCH, CH<sub>3</sub>, and H

|  |                                                                                                                                                                                                                                                                                                                                                                                                                             |
|--|-----------------------------------------------------------------------------------------------------------------------------------------------------------------------------------------------------------------------------------------------------------------------------------------------------------------------------------------------------------------------------------------------------------------------------|
|  | <p>H<sub>2</sub>FP:HNNH MP2= -552.29335375 NIMAG= 0<br/> P,-0.7075959708,0.0505089122,0.<br/> F,-2.3273279387,0.3011845003,0.<br/> H,-0.688098141,-0.9121877708,1.0323793257<br/> H,-0.688098141,-0.9121877708,-1.0323793257<br/> N,1.7122993586,-0.623935582,0.<br/> N,2.4805822327,0.3634579486,0.<br/> H,1.859943778,1.1902307451,0.<br/> H,2.2989590567,-1.4699796358,0.</p>                                            |
|  | <p>H<sub>2</sub>ClP:HNNH MP2= -912.26849542 NIMAG= 0<br/> P,-0.7017347424,0.0511871117,0.<br/> Cl,-2.7734246091,0.387702706,0.<br/> H,-0.7070821535,-0.9095843996,1.0307157817<br/> H,-0.7070821535,-0.9095843996,-1.0307157817<br/> N,1.8459622565,-0.6616478043,0.<br/> N,2.5808366313,0.3523711666,0.<br/> H,1.9365637575,1.1600019186,0.<br/> H,2.4666252482,-1.4833549525,0.</p>                                       |
|  | <p>H<sub>2</sub>(NC)P:HNNH MP2= -545.18434164 NIMAG= 0<br/> P,-0.37523138,-0.04063612,0.<br/> N,-2.12032188,0.02092393,0.<br/> H,-0.28446673,-0.98522254,1.03875265<br/> H,-0.28446673,-0.98522254,-1.03875265<br/> N,2.23962692,-0.47716957,0.<br/> N,2.85778944,0.61203627,0.<br/> H,2.13064407,1.34586345,0.<br/> H,2.94821008,-1.22402663,0.<br/> C,-3.28687666,0.22821058,0.</p>                                       |
|  | <p>H<sub>2</sub>(OH)P:HNNH MP2= -528.27171709 NIMAG= 0<br/> P,-0.7970474145,-0.0169243332,0.<br/> O,-2.47178047,0.1243391569,0.<br/> H,-0.6782959167,-0.9723656362,1.0306367398<br/> H,-0.6782959167,-0.9723656362,-1.0306367398<br/> N,1.9069431213,-0.5464433761,0.<br/> N,2.4788780597,0.5689191959,0.<br/> H,1.7142179865,1.2634586227,0.<br/> H,2.6502558122,-1.2591887603,0.<br/> H,-2.7041730018,1.0576137466,0.</p> |
|  | <p>H<sub>2</sub>(CN)P:HNNH MP2= -545.21191931 NIMAG= 0<br/> P,-0.39587837,-0.04802252,0.<br/> C,-2.19292837,0.02539502,0.<br/> H,-0.3118776,-0.99177536,1.04105009<br/> H,-0.3118776,-0.99177536,-1.04105009<br/> N,2.45041955,-0.49853889,0.<br/> N,2.9522764,0.65041838,0.<br/> H,2.15398556,1.3050913,0.</p>                                                                                                             |

|  |                                                                                                                                                                                                                                                                                                                                                                                                                                                                                                                                    |
|--|------------------------------------------------------------------------------------------------------------------------------------------------------------------------------------------------------------------------------------------------------------------------------------------------------------------------------------------------------------------------------------------------------------------------------------------------------------------------------------------------------------------------------------|
|  | <p>H,3.23870779,-1.1608139,0.<br/>N,-3.35597855,0.19205228,0.</p>                                                                                                                                                                                                                                                                                                                                                                                                                                                                  |
|  | <p>H<sub>2</sub>(CCH)P:HNNH MP2= -529.11405377<br/>NIMAG= 0<br/>P,-0.3978265573,-0.1137093417,0.<br/>C,-2.172127883,0.0094275063,0.<br/>H,-0.2853278257,-1.059488078,1.0391948482<br/>H,-0.2853278257,-1.059488078,-1.0391948482<br/>N,2.5841173022,-0.5190006164,0.<br/>N,2.9401458982,0.6838859712,0.<br/>H,2.063358146,1.2291648263,0.<br/>H,3.4503910117,-1.0759470316,0.<br/>C,-3.3725699061,0.2333163281,0.<br/>H,-4.4216497703,0.4077963637,0.</p>                                                                          |
|  | <p>H<sub>2</sub>(CH<sub>3</sub>)P:HNNH MP2= -492.34969280<br/>NIMAG= 0<br/>P,-0.7920302298,-0.0724030464,0.<br/>C,-2.6243349036,0.2206999429,0.<br/>H,-0.7370773115,-1.0297219705,1.0348375497<br/>H,-0.7370773115,-1.0297219705,-1.0348375497<br/>N,2.3664923745,-0.6465013221,0.<br/>N,2.6187838587,0.5829647703,0.<br/>H,1.6963911692,1.0468519226,0.<br/>H,3.2784350408,-1.1257175128,0.<br/>H,-2.8841848856,0.8074220799,-0.8791831992<br/>H,-3.2048921256,-0.6974731635,0.<br/>H,-2.8841848856,0.8074220799,0.8791831992</p> |
|  | <p>H<sub>3</sub>P:HNNH MP2= -453.12120386 NIMAG= 0<br/>P,-0.9469862941,0.1044569286,0.<br/>H,-2.3296027645,0.3958066703,0.<br/>H,-1.0339803893,-0.8476744791,1.0358812415<br/>H,-1.0339803893,-0.8476744791,-1.0358812415<br/>N,2.1131766582,-0.792800885,0.<br/>N,2.5335130852,0.3895335184,0.<br/>H,1.6870862604,0.9800691194,0.<br/>H,2.9497545824,-1.3936239971,0.</p>                                                                                                                                                         |
|  | <p>H<sub>2</sub>FP:HNNF MP2= -651.39209724 NIMAG= 0<br/>P,-0.8827721519,0.0890600794,0.<br/>F,-2.4939831322,0.2890673092,0.<br/>H,-0.8024880766,-0.8777335601,1.0272170187<br/>H,-0.8024880766,-0.8777335601,-1.0272170187<br/>N,1.8189647517,-0.5386961615,0.<br/>N,2.5769767444,0.4105482837,0.<br/>H,1.9391562525,1.2194516431,0.<br/>F,2.588726132,-1.7271997641,0.</p>                                                                                                                                                        |

|  |                                                                                                                                                                                                                                                                                                                                                                                                                             |
|--|-----------------------------------------------------------------------------------------------------------------------------------------------------------------------------------------------------------------------------------------------------------------------------------------------------------------------------------------------------------------------------------------------------------------------------|
|  | <p>H<sub>2</sub>(OH)P:HNNF MP2= -627.37335818 NIMAG= 0<br/> P,-0.9288368228,-0.027535284,0.<br/> O,-2.5794631059,0.2187887369,0.<br/> H,-0.8493745324,-0.9892637272,1.0298788137<br/> H,-0.8493745324,-0.9892637272,-1.0298788137<br/> N,2.0845791737,-0.525489887,0.<br/> N,2.4827063678,0.6215424639,0.<br/> H,1.6041610208,1.162780225,0.<br/> F,3.2148286025,-1.3887115878,0.<br/> H,-2.7585239082,1.1641957673,0.</p>  |
|  | <p>H<sub>2</sub>CIP:HNNF MP2= -1011.36835154 NIMAG= 0<br/> P,-0.8670583859,0.0804362356,0.<br/> Cl,-2.9072673444,0.4566248149,0.<br/> H,-0.8619569855,-0.8853039166,1.0283020641<br/> H,-0.8619569855,-0.8853039166,-1.0283020641<br/> N,1.9885695287,-0.6160144566,0.<br/> N,2.6435309383,0.4071577092,0.<br/> H,1.9250241124,1.1454653097,0.<br/> F,2.883086617,-1.7163394756,0.</p>                                      |
|  | <p>H<sub>2</sub>(CN)P:HNNF MP2= -644.28332042 NIMAG= 0<br/> P,-0.5381725717,0.0002842733,0.<br/> N,-2.2676718298,-0.0042027595,0.<br/> H,-0.3846673639,-0.9437569596,1.0342813694<br/> H,-0.3846673639,-0.9437569596,-1.0342813694<br/> N,2.333349776,-0.3609755147,0.<br/> N,3.0011761904,0.6541161107,0.<br/> H,2.2976790681,1.405757574,0.<br/> F,3.211212344,-1.4711672978,0.<br/> C,-3.441530495,0.1580229822,0.</p>   |
|  | <p>H<sub>2</sub>(NC)P:HNNF MP2= -644.31249690 NIMAG= 0<br/> P,-0.517032112,-0.0533465211,0.<br/> C,-2.3052397242,0.0322704228,0.<br/> H,-0.4257411057,-1.0001573864,1.0398200334<br/> H,-0.4257411057,-1.0001573864,-1.0398200334<br/> N,2.533865787,-0.3976948185,0.<br/> N,3.0336652842,0.7098321891,0.<br/> H,2.2190231123,1.3396105977,0.<br/> F,3.5800022442,-1.3540988627,0.<br/> N,-3.4670482147,0.2063365119,0.</p> |
|  | <p>H<sub>2</sub>(CCH)P:HNNF MP2= -628.21687331<br/> NIMAG= 0<br/> P,-1.07331507,-0.2122254,0.<br/> C,-2.83552506,-0.03724057,0.<br/> H,-0.97206859,-1.15954727,1.04017745<br/> H,-0.97206859,-1.15954727,-1.04017745<br/> N,2.217211,-0.08877856,0.<br/> N,2.19762577,1.12443618,0.<br/> H,1.18689513,1.33490662,0.<br/> F,3.57920983,-0.50951685,0.<br/> C,-4.02889584,0.21793079,0.</p>                                   |

|                                                                                    |                                                                                                                                                                                                                                                                                                                                                                                                                                                                                                                                                                     |
|------------------------------------------------------------------------------------|---------------------------------------------------------------------------------------------------------------------------------------------------------------------------------------------------------------------------------------------------------------------------------------------------------------------------------------------------------------------------------------------------------------------------------------------------------------------------------------------------------------------------------------------------------------------|
| 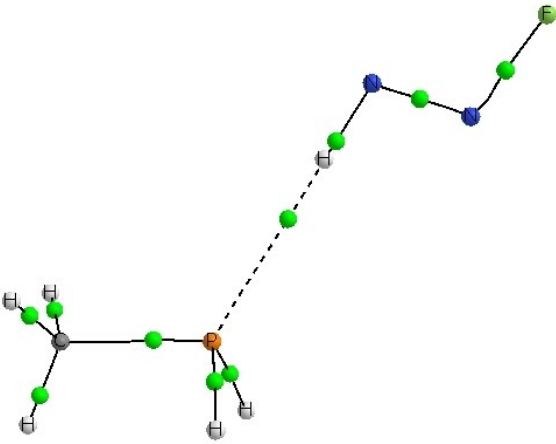  | <p>H,-5.07334861,0.41933356,0.<br/> H<sub>2</sub>(CH<sub>3</sub>)P:HNNF MP2= -591.45563867 NIMAG= 0<br/> P,-0.627589143,1.5524418434,0.<br/> C,0.3370098042,3.1314671934,0.<br/> H,-1.5349428762,1.844926707,1.0391329882<br/> H,-1.5349428762,1.844926707,-1.0391329882<br/> N,-0.0262772685,-2.4154794794,0.<br/> N,0.9133801788,-1.6552779413,0.<br/> H,0.4713798037,-0.7157932017,0.<br/> F,0.4904259529,-3.7611867337,0.<br/> H,0.9766301592,3.1481006168,-0.8800021808<br/> H,-0.2977258899,4.0125086755,0.<br/> H,0.9766301592,3.1481006168,0.8800021808</p> |
|  | <p>H<sub>3</sub>P:HNNF MP2= -552.22575945 NIMAG= 0<br/> P,-1.1585455985,-0.068994455,0.<br/> H,-2.1270120872,0.9547908494,0.<br/> H,-1.7566086895,-0.808458267,1.0398830505<br/> H,-1.7566086895,-0.808458267,-1.0398830505<br/> N,2.7319537426,-0.8804172306,0.<br/> N,2.4384585765,0.2941904661,0.<br/> H,1.4036607519,0.2836481188,0.<br/> F,4.1636827472,-0.978208818,0.</p>                                                                                                                                                                                    |

|                                                                                     |                                                                                                                                                                                                                                                                                                                                                                                                                                                                |
|-------------------------------------------------------------------------------------|----------------------------------------------------------------------------------------------------------------------------------------------------------------------------------------------------------------------------------------------------------------------------------------------------------------------------------------------------------------------------------------------------------------------------------------------------------------|
| 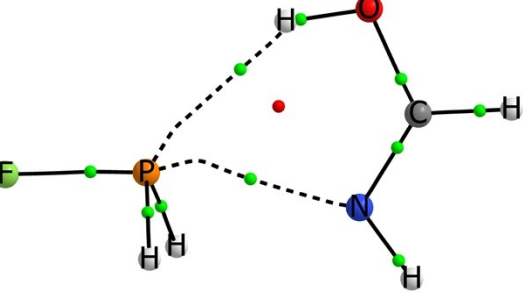 | <p>H<sub>2</sub>FP:NHCHOH MP2= -611.44318650 NIMAG= 0<br/> P,-1.0974052509,-0.058928926,0.<br/> F,-2.6899974887,0.3352648426,0.<br/> H,-1.1513378361,-0.9975072412,1.0458013564<br/> H,-1.1513378361,-0.9975072412,-1.0458013564<br/> N,1.1953039681,-1.0721899065,0.<br/> C,2.1373239741,-0.208613757,0.<br/> O,1.9038802705,1.1007322279,0.<br/> H,3.2009842083,-0.430757073,0.<br/> H,0.9260432854,1.2055559589,0.<br/> H,1.5660097521,-2.0173587415,0.</p> |
|  | <p>H<sub>2</sub>ClP:NHCHOH MP2= -971.41763344<br/> NIMAG= 0<br/> P,-1.0965666508,-0.0572623552,0.<br/> Cl,-3.1446648969,0.4252504902,0.<br/> H,-1.1568198736,-0.9970508858,1.0423501352<br/> H,-1.1568198736,-0.9970508858,-1.0423501352<br/> N,1.3006692101,-1.1024027682,0.<br/> C,2.2303530697,-0.2274732598,0.</p>                                                                                                                                         |

|  |                                                                                                                                                                                                                                                                                                                                                                                                                                                                                                                                             |
|--|---------------------------------------------------------------------------------------------------------------------------------------------------------------------------------------------------------------------------------------------------------------------------------------------------------------------------------------------------------------------------------------------------------------------------------------------------------------------------------------------------------------------------------------------|
|  | <p>O,1.9816202727,1.0818620178,0.<br/> H,3.2979907076,-0.4307595025,0.<br/> H,1.0068122815,1.1827594866,0.<br/> H,1.6887087199,-2.0410326877,0.</p>                                                                                                                                                                                                                                                                                                                                                                                         |
|  | <p>H<sub>2</sub>(OH)P:NHCHOH MP2= -587.42098059 NIMAG= 0<br/> P,-1.1496936988,-0.0860815499,0.<br/> O,-2.7973260638,0.2328602314,0.<br/> H,-1.1129747082,-1.0316360429,1.0402779193<br/> H,-1.1129747082,-1.0316360429,-1.0402779193<br/> N,1.4284800142,-1.1206479577,0.<br/> C,2.2685789254,-0.1599811774,0.<br/> O,1.890586012,1.1200524755,0.<br/> H,3.3517944512,-0.2546359717,0.<br/> H,0.907123677,1.1163422789,0.<br/> H,-2.9357073231,1.1846714683,0.<br/> H,1.9137555991,-2.0129349961,0.</p>                                     |
|  | <p>H<sub>2</sub>(CN)P:NHCHOH MP2= -604.33320818 NIMAG= 0<br/> P,-0.7669014056,-0.159415007,0.<br/> N,-2.5027714712,0.0770327495,0.<br/> H,-0.7621918278,-1.0914244897,1.0485394303<br/> H,-0.7621918278,-1.0914244897,-1.0485394303<br/> N,1.7027385855,-1.0345885175,0.<br/> C,2.5908764325,-0.1176749939,0.<br/> O,2.2840581916,1.1796399985,0.<br/> H,3.6665295576,-0.2714558823,0.<br/> H,1.3089632723,1.2447855223,0.<br/> C,-3.6437114214,0.3969765237,0.<br/> H,2.1367748266,-1.9528718101,0.</p>                                    |
|  | <p>H<sub>2</sub>(CCH)P:NHCHOH MP2= -588.26202844 NIMAG= 0<br/> P,-0.8217269431,-0.1892753693,0.<br/> C,-2.5870189777,0.023981948,0.<br/> H,-0.733088045,-1.1251294875,1.0465756747<br/> H,-0.733088045,-1.1251294875,-1.0465756747<br/> N,2.0665076537,-1.0738853572,0.<br/> C,2.7737734188,-0.0133922425,0.<br/> O,2.2368113661,1.2118202388,0.<br/> H,3.8600610465,0.0378738527,0.<br/> H,1.2643693273,1.0978091208,0.<br/> C,-3.7751940228,0.3058652262,0.<br/> H,-4.8146594294,0.5310171745,0.<br/> H,2.6712479521,-1.8903388723,0.</p> |

|  |                                                                                                                                                                                                                                                                                                                                                                                                                                                                                                                                                                                                                      |
|--|----------------------------------------------------------------------------------------------------------------------------------------------------------------------------------------------------------------------------------------------------------------------------------------------------------------------------------------------------------------------------------------------------------------------------------------------------------------------------------------------------------------------------------------------------------------------------------------------------------------------|
|  | <p>H<sub>2</sub>(NC)P:NHCHOH MP2= -604.35962171 NIMAG= 0<br/> P,-0.8270561244,-0.129158908,0.<br/> C,-2.6159023724,0.0785581829,0.<br/> H,-0.7964795794,-1.0635169129,1.0486862264<br/> H,-0.7964795794,-1.0635169129,-1.0486862264<br/> N,1.8876842264,-1.0705614452,0.<br/> C,2.7249167631,-0.1096360119,0.<br/> O,2.3481194873,1.1736633407,0.<br/> H,3.8081992496,-0.1978471046,0.<br/> H,1.3728986711,1.1871714439,0.<br/> N,-3.7636979115,0.3301320489,0.<br/> H,2.3786597773,-1.9599623503,0.</p>                                                                                                             |
|  | <p>H<sub>2</sub>(CH<sub>3</sub>)P:NHCHOH MP2= -551.49813525 NIMAG= 0<br/> P,-1.1525449873,-0.0930447648,0.<br/> C,-2.959729222,0.3132772233,0.<br/> H,-1.1288481308,-1.0402884546,1.0415460113<br/> H,-1.1288481308,-1.0402884546,-1.0415460113<br/> N,1.8445884219,-1.2463223226,0.<br/> C,2.5283934857,-0.1701952443,0.<br/> O,1.9681249868,1.0440325697,0.<br/> H,3.6140239587,-0.0970919903,0.<br/> H,0.9936204939,0.9140764491,0.<br/> H,-3.1846181607,0.9134768334,-0.8796433267<br/> H,-3.5920405437,-0.5703073774,0.<br/> H,-3.1846181607,0.9134768334,0.8796433267<br/> H,2.4715524745,-2.0460338057,0.</p> |
|  | <p>H<sub>3</sub>P:NHCHOH MP2= -512.26874042 NIMAG= 0<br/> P,-1.3556025557,0.038314336,0.<br/> H,-2.7352295586,0.3417275494,0.<br/> H,-1.4201068652,-0.9042641688,1.0426047589<br/> H,-1.4201068652,-0.9042641688,-1.0426047589<br/> N,1.5875622569,-1.245021778,0.<br/> C,2.3465068128,-0.221607264,0.<br/> O,1.8720686802,1.0302397718,0.<br/> H,3.4342317033,-0.2232004736,0.<br/> H,0.8947723601,0.9683729515,0.<br/> H,2.1536735629,-2.088811653,0.</p>                                                                                                                                                          |

Table S2. Electron density properties at intermolecular BCPs (au)  
 $P \cdots N_1$  pnictogen bonds in  $H_2XP:HN=NH$  complexes

| HN=NH with   | $\rho_{BCP}$ | $\nabla^2\rho_{BCP}$ | $H_{BCP}$ |
|--------------|--------------|----------------------|-----------|
| $H_2FP$      | 0.035        | 0.069                | -0.005    |
| $H_2CIP$     | 0.027        | 0.063                | -0.002    |
| $H_2(NC)P$   | 0.027        | 0.062                | -0.002    |
| $H_2(OH)P$   | 0.022        | 0.057                | -0.001    |
| $H_2(CN)P$   | 0.017        | 0.048                | 0.000     |
| $H_2(CCH)P$  | 0.014        | 0.041                | 0.001     |
| $H_2(CH_3)P$ | 0.009        | 0.031                | 0.001     |
| $H_3P$       | 0.010        | 0.032                | 0.001     |

$N_2-H_2 \cdots P$  hydrogen bonds in  $H_2XP:HN=NH$  complexes

| HN=NH with   | $\rho_{BCP}$ | $\nabla^2\rho_{BCP}$ | $H_{BCP}$ |
|--------------|--------------|----------------------|-----------|
| $H_2(CH_3)P$ | 0.012        | 0.030                | 0.001     |
| $H_3P$       | 0.011        | 0.028                | 0.001     |

$P \cdots N$  pnictogen bonds in  $H_2XP:HN=NF$  complexes

| HN=NF with | $\rho_{BCP}$ | $\nabla^2\rho_{BCP}$ | $H_{BCP}$ |
|------------|--------------|----------------------|-----------|
| $H_2FP$    | 0.019        | 0.055                | 0.000     |
| $H_2CIP$   | 0.014        | 0.044                | 0.001     |
| $H_2(NC)P$ | 0.016        | 0.047                | 0.001     |
| $H_2(OH)P$ | 0.012        | 0.038                | 0.001     |
| $H_2(CN)P$ | 0.011        | 0.036                | 0.001     |

$N_2-H_2 \cdots P$  hydrogen bonds in  $H_2XP:HN=NF$  complexes

| HN=NF with   | $\rho_{BCP}$ | $\nabla^2\rho_{BCP}$ | $H_{BCP}$ |
|--------------|--------------|----------------------|-----------|
| $H_2(OH)P$   | 0.011        | 0.029                | 0.001     |
| $H_2(CCH)P$  | 0.012        | 0.028                | 0.001     |
| $H_2(CH_3)P$ | 0.018        | 0.034                | -0.001    |
| $H_3P$       | 0.016        | 0.032                | -0.0002   |



P $\cdots$ N pnicoen bonds in H<sub>2</sub>XP:NH=CHOH complexes

| NH=CHOH with                       | $\rho_{\text{BCP}}$ | $\nabla^2\rho_{\text{BCP}}$ | $H_{\text{BCP}}$ |
|------------------------------------|---------------------|-----------------------------|------------------|
| H <sub>2</sub> FP                  | 0.034               | 0.068                       | -0.005           |
| H <sub>2</sub> CIP                 | 0.029               | 0.063                       | -0.002           |
| H <sub>2</sub> (NC)P               | 0.028               | 0.063                       | -0.002           |
| H <sub>2</sub> (OH)P               | 0.021               | 0.054                       | -0.0004          |
| H <sub>2</sub> (CN)P               | 0.018               | 0.048                       | 0.000            |
| H <sub>2</sub> (CCH)P              | 0.014               | 0.039                       | 0.001            |
| H <sub>2</sub> (CH <sub>3</sub> )P | 0.010               | 0.030                       | 0.001            |
| H <sub>3</sub> P                   | 0.010               | 0.030                       | 0.001            |

O-H<sub>2</sub> $\cdots$ P hydrogen bonds in H<sub>2</sub>XP:NH=CHOH complexes

| NH=CHOH with                       | $\rho_{\text{BCP}}$ | $\nabla^2\rho_{\text{BCP}}$ | $H_{\text{BCP}}$ |
|------------------------------------|---------------------|-----------------------------|------------------|
| H <sub>2</sub> FP                  | 0.023               | 0.041                       | -0.002           |
| H <sub>2</sub> CIP                 | 0.020               | 0.039                       | -0.001           |
| H <sub>2</sub> (NC)P               | 0.017               | 0.037                       | 0.000            |
| H <sub>2</sub> (OH)P               | 0.023               | 0.038                       | -0.002           |
| H <sub>2</sub> (CN)P               | 0.015               | 0.033                       | 0.000            |
| H <sub>2</sub> (CCH)P              | 0.019               | 0.036                       | -0.001           |
| H <sub>2</sub> (CH <sub>3</sub> )P | 0.023               | 0.036                       | -0.002           |
| H <sub>3</sub> P                   | 0.019               | 0.036                       | -0.001           |

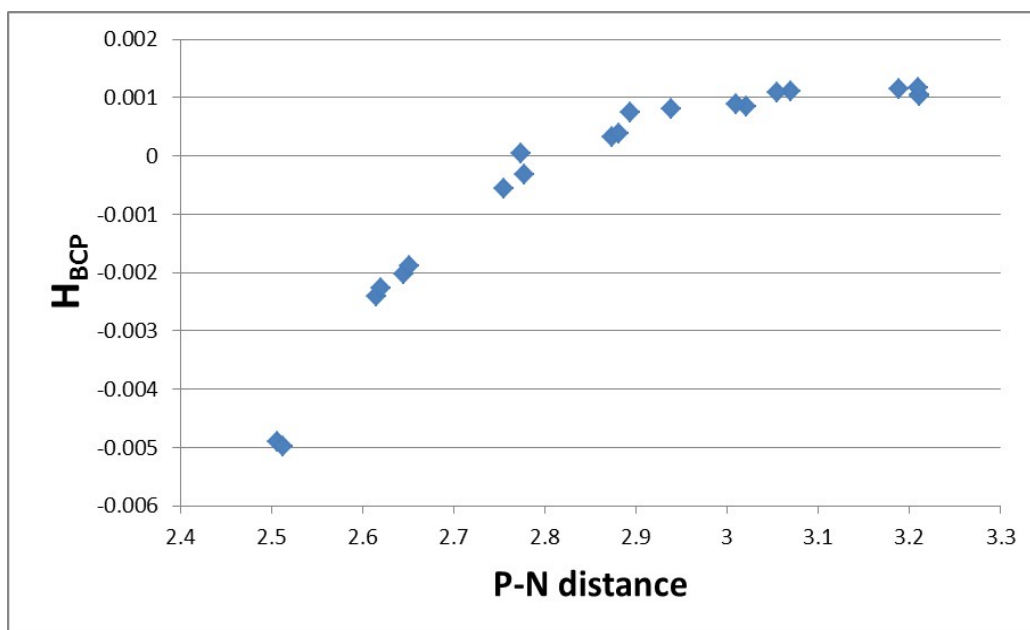

Figure S1. Energy densities at bond critical points (au) vs. the P-N distance (Å) for P...N pnictogen bonds in  $H_2XP:NH=CHOH$  complexes

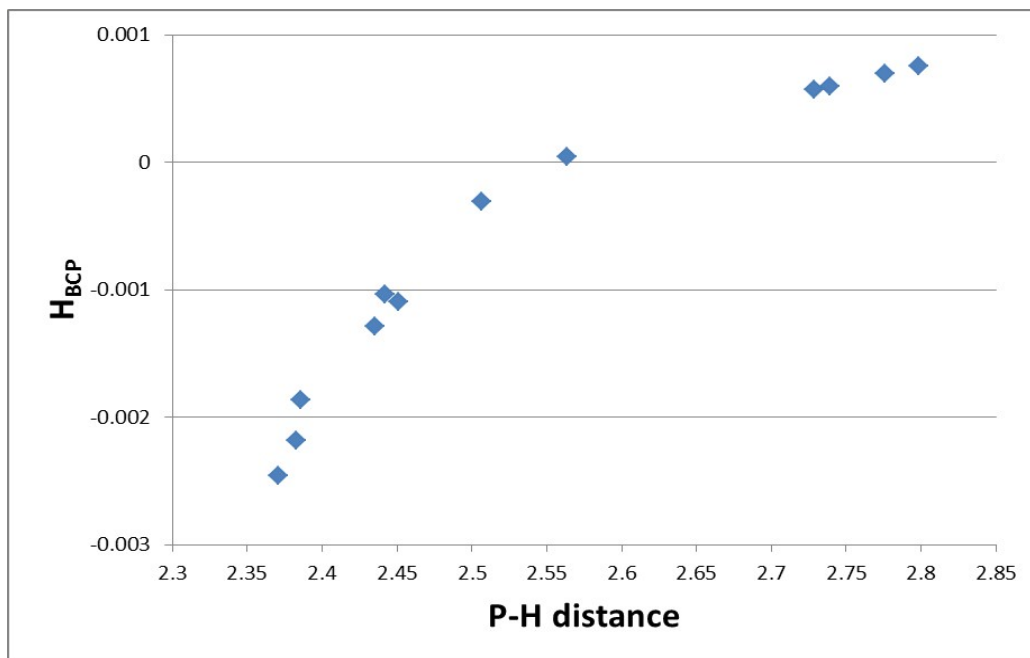

Fig. S2. Energy densities at bond critical points (au) vs the P- $H_2$  distance (Å) for hydrogen bonds in  $H_2XP:NH=CHOH$  complexes

Table S3. Components of  ${}^1\text{P}(\text{P}-\text{N}_1)$  (Hz) for complexes of  $\text{H}_2\text{XP}$  with  $\text{HN}=\text{NH}$ ,  $\text{FN}=\text{NH}$ , and  $\text{NH}=\text{CHOH}$

|                                   | PSO  | DSO  | FC    | SD   | ${}^1\text{P}(\text{P}-\text{N}_1)$ |
|-----------------------------------|------|------|-------|------|-------------------------------------|
| <b>HNNH w.</b>                    |      |      |       |      |                                     |
| $\text{H}_2\text{FP}$             | -0.2 | -0.1 | -55.5 | 0.0  | -55.8                               |
| $\text{H}_2\text{CIP}$            | -0.3 | -0.1 | -55.7 | 0.1  | -55.9                               |
| $\text{H}_2(\text{NC})\text{P}$   | -0.2 | 0.0  | -49.6 | 0.0  | -49.8                               |
| $\text{H}_2(\text{OH})\text{P}$   | -0.2 | 0.0  | -37.0 | 0.0  | -37.1                               |
| $\text{H}_2(\text{CN})\text{P}$   | -0.1 | 0.0  | -30.8 | 0.0  | -30.9                               |
| $\text{H}_2(\text{CCH})\text{P}$  | 0.0  | 0.0  | -20.9 | 0.0  | -21.0                               |
| $\text{H}_2(\text{CH}_3)\text{P}$ | 0.0  | 0.0  | -8.4  | 0.0  | -8.3                                |
| $\text{H}_3\text{P}$              | 0.0  | 0.0  | -10.2 | 0.0  | -10.2                               |
| <b>FNNH w</b>                     |      |      |       |      |                                     |
| $\text{H}_2\text{FP}$             | -0.2 | -0.1 | -57.7 | 0    | -57.9                               |
| $\text{H}_2\text{CIP}$            | -0.2 | -0.1 | -41.7 | 0    | -41.9                               |
| $\text{H}_2(\text{NC})\text{P}$   | -0.1 | -0.1 | -47.1 | 0    | -47.3                               |
| $\text{H}_2(\text{OH})\text{P}$   | -0.1 | -0.1 | -21.5 | 0    | -21.6                               |
| $\text{H}_2(\text{CN})\text{P}$   | 0    | -0.1 | -27.9 | 0    | -28                                 |
| $\text{H}_2(\text{CCH})\text{P}$  | 0    | 0    | -8.7  | 0    | -8.7                                |
| $\text{H}_2(\text{CH}_3)\text{P}$ | 0.1  | 0    | 1.1   | 0    | 1.2                                 |
| $\text{H}_3\text{P}$              | 0.1  | 0    | 1.6   | 0    | 1.6                                 |
| <b>NHCHOH w</b>                   |      |      |       |      |                                     |
| $\text{H}_2\text{FP}$             | -0.8 | -0.1 | -51.3 | -0.1 | -52.3                               |
| $\text{H}_2\text{CIP}$            | -0.7 | -0.1 | -57.8 | 0.1  | -58.5                               |
| $\text{H}_2(\text{NC})\text{P}$   | -0.5 | -0.1 | -51.8 | 0.0  | -52.4                               |
| $\text{H}_2(\text{OH})\text{P}$   | -0.3 | -0.1 | -39.0 | 0.1  | -39.3                               |
| $\text{H}_2(\text{CN})\text{P}$   | -0.1 | 0.0  | -36.6 | 0.1  | -36.7                               |
| $\text{H}_2(\text{CCH})\text{P}$  | 0.0  | 0.0  | -27.5 | 0.1  | -27.5                               |
| $\text{H}_2(\text{CH}_3)\text{P}$ | 0.0  | 0.0  | -16.0 | 0.1  | -15.9                               |
| $\text{H}_3\text{P}$              | 0.0  | 0.0  | -16.9 | 0.1  | -16.8                               |

Table S4. Components of spin-spin coupling constants J(N-P) (Hz) for complexes of H<sub>2</sub>XP with HN=NH and FN=NH, and <sup>2h</sup>J(O-P) for complexes with NH=CHOH

| HNNH w                             | PSO  | DSO | FC    | SD   | J(N <sub>2</sub> -P) |
|------------------------------------|------|-----|-------|------|----------------------|
| H <sub>2</sub> FP                  | 0.7  | 0.0 | -6.3  | 0.0  | -5.6                 |
| H <sub>2</sub> CIP                 | 0.5  | 0.0 | -5.0  | 0.0  | -4.5                 |
| H <sub>2</sub> (NC)P               | 0.4  | 0.0 | -4.4  | 0.0  | -4.0                 |
| H <sub>2</sub> (OH)P               | 0.3  | 0.0 | -5.4  | 0.0  | -5.0                 |
| H <sub>2</sub> (CN)P               | 0.1  | 0.0 | -3.3  | 0.0  | -3.1                 |
| H <sub>2</sub> (CCH)P              | 0.1  | 0.0 | -4.5  | 0.1  | -4.3                 |
| H <sub>2</sub> (CH <sub>3</sub> )P | 0.1  | 0.0 | -5.6  | 0.1  | -5.3                 |
| H <sub>3</sub> P                   | 0.1  | 0.0 | -4.2  | 0.1  | -4.1                 |
| FNNH w                             |      |     |       |      |                      |
| H <sub>2</sub> FP                  | 0.2  | 0   | 0.2   | 0    | 0.4                  |
| H <sub>2</sub> CIP                 | 0.1  | 0   | -0.2  | 0    | -0.1                 |
| H <sub>2</sub> (NC)P               | 0.1  | 0   | 0.4   | 0    | 0.4                  |
| H <sub>2</sub> (OH)P               | 0.1  | 0   | -2.7  | 0.1  | -2.5                 |
| H <sub>2</sub> (CN)P               | 0    | 0   | 0     | 0    | 0.1                  |
| H <sub>2</sub> (CCH)P              | 0.1  | 0   | -4.1  | 0.1  | -3.9                 |
| H <sub>2</sub> (CH <sub>3</sub> )P | 0    | 0   | -17.8 | -0.3 | -18 <sup>a</sup>     |
| H <sub>3</sub> P                   | 0.1  | 0   | -12   | -0.2 | -12.1 <sup>a</sup>   |
| NHCHOH w                           |      |     |       |      | <sup>2h</sup> J(O-P) |
| H <sub>2</sub> FP                  | 0.4  | 0.0 | -18.5 | 0.2  | -17.9                |
| H <sub>2</sub> CIP                 | 0.4  | 0.0 | -11.8 | 0.2  | -11.2                |
| H <sub>2</sub> (NC)P               | 0.3  | 0.0 | -7.3  | 0.2  | -6.9                 |
| H <sub>2</sub> (OH)P               | 0.0  | 0.0 | -19.2 | 0.2  | -19.1                |
| H <sub>2</sub> (CN)P               | 0.0  | 0.0 | -5.0  | 0.1  | -4.8                 |
| H <sub>2</sub> (CCH)P              | -0.1 | 0.0 | -14.0 | 0.1  | -14.0                |
| H <sub>2</sub> (CH <sub>3</sub> )P | -0.2 | 0.0 | -23.5 | 0.0  | -23.8                |
| H <sub>3</sub> P                   | -0.2 | 0.0 | -16.1 | 0.1  | -16.2                |

a) <sup>2h</sup>J(N-P)

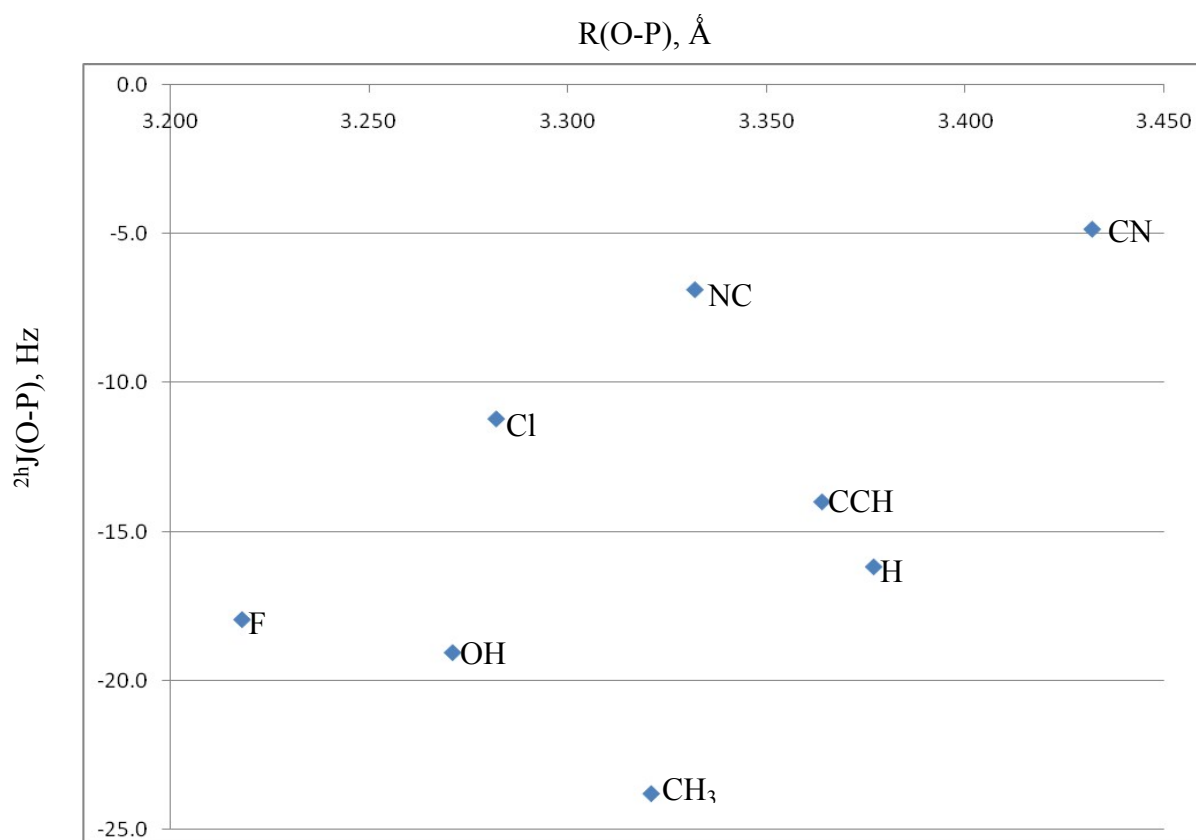

Figure S3.  ${}^2hJ(\text{O-P})$  versus the O-P distance for complexes  $\text{H}_2\text{XP}:\text{NH}=\text{CHOH}$
